# Supplementary material
Source: publisher figshare collection journal article supplement (https://acs.figshare.com/ndownloader/files/3619995)
Supplement: Supplementary file 1 [file 3619995]

## Supplemental Information

### Methane Emissions from Natural Gas Compressor Stations in the Transmission and Storage Sector: Measurements and Comparisons with the EPA Greenhouse Gas Reporting Program Protocol

R Subramanian<sup>a</sup>, Laurie L. Williams<sup>b</sup>, Timothy L. Vaughn<sup>c</sup>, Daniel Zimmerle<sup>c</sup>, Joseph R. Roscioli<sup>d</sup>, Scott C. Herndon<sup>d</sup>, Tara I. Yacovitch<sup>d</sup>, Cody Floerchinger<sup>d</sup>, Daniel S. Tkacik<sup>a</sup>, Austin L. Mitchell<sup>a</sup>, Melissa R. Sullivan<sup>a</sup>, Timothy R. Dallmann<sup>a</sup>, Allen L. Robinson<sup>\*,a</sup>

<sup>a</sup> Center for Atmospheric Particle Studies (CAPS) and the Department of Mechanical Engineering, Carnegie Mellon University, Pittsburgh, PA 15213

<sup>b</sup> Department of Physics and Engineering, Fort Lewis College, Durango, CO 81301

<sup>c</sup> Energy Institute, Colorado State University, Fort Collins, CO 80524

<sup>d</sup> Aerodyne Research Inc, Billerica, MA 01821

\* Corresponding author: [alr@andrew.cmu.edu](mailto:alr@andrew.cmu.edu); Phone: 412-268-3657/Fax: 412-268-3348

**Mini-summary:** Here, we describe the 45 study sites, including compressor types, operating state, facility horsepower, and other details. This is followed by a comparison of the annual GHGRP emissions reported (or the equivalent) for the study sites with the corresponding data for the Partner fleet of compressor stations. The methodological details for the onsite emissions measurements, the EPA Greenhouse Gas Reporting Protocol (GHGRP), and tracer flux are described here. Site-level onsite and tracer data presented in this manuscript are also provided.

## Study Sites and Similarity of Emissions with Overall Partner Fleet

Table S1 provides a census of facilities tested in this study; individual site details are provided in Table S2, including number of compressors in each operating state, type of facility (storage or transmission), whether required to report under GHGRP (Subpart-W), type of onsite protocol employed (described in a later section), and total site horsepower. Two storage facilities were sampled in two different modes and therefore appear twice in the site-specific data tables.

**Table S1:** Census of facilities tested in this study. Two storage facilities were sampled in two different operating conditions (denoted in parentheses), for a total of 47 unique configurations or sites.

| Category     | Number  | GHGRP reporters | Compressor Types   |                  |            | Sites with at least one unit operating |
|--------------|---------|-----------------|--------------------|------------------|------------|----------------------------------------|
|              |         |                 | Reciprocating only | Centrifugal only | Both types |                                        |
| Transmission | 37      | 23              | 12                 | 21               | 4          | 15                                     |
| Storage      | 8 (10)  | 2               | 7                  | 0                | 1          | 5                                      |
| Total        | 45 (47) | 25              | 19                 | 21               | 5          | 20                                     |

The representativeness of the study site emissions to the Partner fleet was evaluated by comparing the 2012 GHGRP-reported (or GHGRP-equivalent) annual emissions for the study sites with the 2012 GHGRP-reported (or GHGRP-equivalent) emissions for Partner facilities for which such data are available. 2012 GHGRP data were available for twenty nine study sites. Twenty-five of these sites were required to report under the GHGRP. Four were non-reporter facilities, at which the company performed an onsite survey but the annual facility emissions were not above the 25,000 MT-CO<sub>2</sub>e and so were not required to be reported under GHGRP. These data were compared against 343 Partner facilities for which 2012 GHGRP data were available (Figure S1.) Although the study sites do not have as long of a tail as the entire population, a two-sample Kolmogorov-Smirnov goodness-of-fit hypothesis test indicates that two population emissions were drawn from the same underlying distribution at 95% confidence. The study onsite surveys did not capture the emissions from the two highest emitting facilities in this study, which could have provided a long tail.

Seven facilities were not included in the tracer flux-SOE comparisons presented in the main paper. At three facilities (#1, #3, #23), the tracer flux measurements were collected in a different operating mode than the onsite measurements (even though both sets of measurement were made on the same day). Unfavorable wind/road combinations prevented the collection of tracer flux data at Sites #7, #21, #33, and so these sites are excluded from the tracer flux-SOE comparison. Tracer flux data from one site (#24) had to be discarded because the ethane/methane ratio indicated a significant non-facility source of methane, as discussed in a later section. However, the onsite emissions measurements at these seven sites (#1, #3, #7, #21, #23, #24, #33) are included in the SOE-GHGRP comparison in the main paper.

Onsite and tracer flux data were collected at a 46<sup>th</sup> site (#19), but they are not included in this paper because the primary and secondary onsite techniques used by the onsite survey to measure vent emissions differed by a factor-of-seven. At this site the compressors were vented into a common manifold to the blowdown vent stack, therefore it was suspected that there was double counting of emissions.

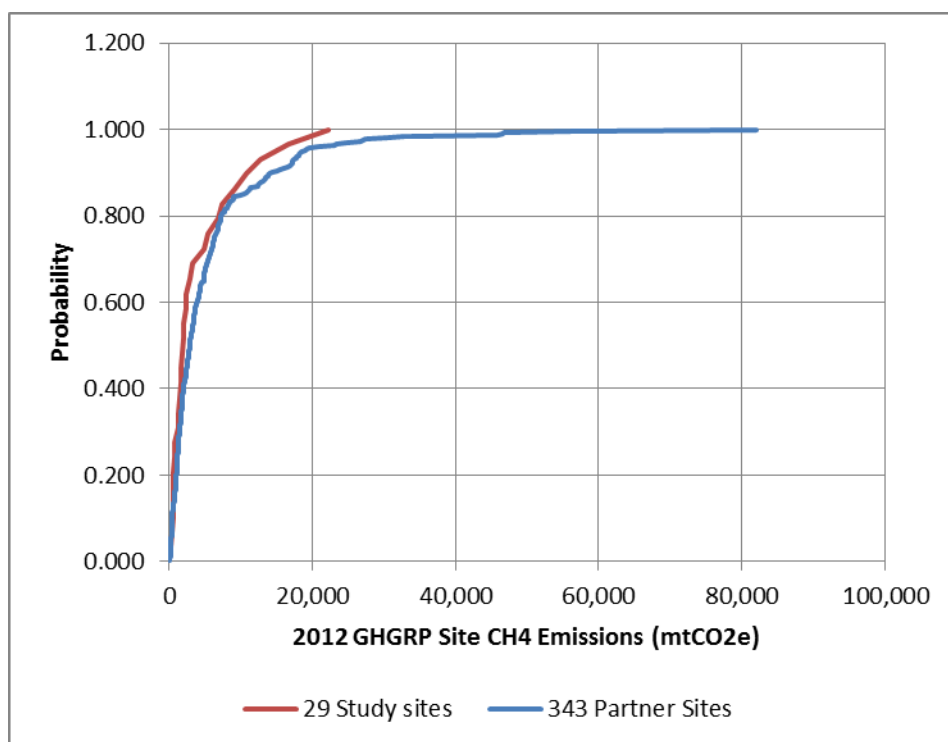

**Figure S1:** Comparison of total annual emissions from 29 sites tested in this study, for which 2012 GHGRP survey data are available, with the broader set of Partner sites. Both compare the data submitted by the Partners to GHGRP, or its equivalent (for non-reporter sites.)

**Table S2:** Summary of Site Information: Site census, operating state, total onsite horsepower, onsite measurement protocol

|          | Reciprocating Compressors |                  |                 | Centrifugal Compressors |                  |                 | Subpart-W Reporter? |               |                  | If Storage:         |                 |
|----------|---------------------------|------------------|-----------------|-------------------------|------------------|-----------------|---------------------|---------------|------------------|---------------------|-----------------|
| Site #   | NOP <sup>1</sup>          | NOD <sup>2</sup> | OP <sup>3</sup> | NOP <sup>1</sup>        | NOD <sup>2</sup> | OP <sup>3</sup> |                     | Facility Type | Onsite Protocol  | Injecting/Quiescent | Total Onsite HP |
| 1        | 5                         | 2                |                 |                         | 1                |                 | No                  | Storage       | Study Protocol   | Quiescent           | 18670           |
| 2        |                           | 8                |                 |                         |                  |                 | No                  | Transmission  | Study Protocol   |                     | 8600            |
| 3        |                           |                  |                 |                         | 2                |                 | Yes                 | Transmission  | Study Protocol   |                     | 24000           |
| 4        |                           |                  |                 |                         | 9                |                 | No                  | Transmission  | Study Protocol   |                     | 21300           |
| 5        |                           |                  |                 |                         | 1                |                 | No                  | Transmission  | Study Protocol   |                     | 21597           |
| 6        |                           |                  |                 | 2                       |                  |                 | Yes                 | Transmission  | GHGRP-equivalent |                     | 37012           |
| 7        |                           |                  |                 |                         |                  | 1               | Yes                 | Transmission  | GHGRP-equivalent |                     | 37950           |
| 8        |                           |                  |                 |                         | 1                | 1               | No                  | Transmission  | Study Protocol   |                     | 9150            |
| 9        |                           |                  |                 | 3                       |                  |                 | Yes                 | Transmission  | GHGRP-equivalent |                     | 59273           |
| 10       | 1                         | 1                | 4               |                         | 1                |                 | Yes                 | Transmission  | Study Protocol   |                     | 34600           |
| 11       |                           |                  |                 |                         |                  | 1               | Yes                 | Transmission  | GHGRP-equivalent |                     | 37950           |
| 12       |                           |                  | 3               |                         |                  |                 | Yes                 | Transmission  | Study Protocol   |                     | 14350           |
| 13       |                           |                  |                 | 1                       | 2                |                 | Yes                 | Transmission  | GHGRP-equivalent |                     | 59273           |
| 14       |                           | 6                |                 |                         |                  |                 | No                  | Storage       | Study Protocol   | Quiescent           | 6126            |
| 15       |                           |                  | 4               |                         |                  |                 | No                  | Storage       | Study Protocol   | Injecting           | 4184            |
| 16.1     | 2                         |                  |                 |                         |                  |                 | No                  | Storage       | Study Protocol   | Quiescent           | 8456            |
| 16.2     | 1                         |                  | 1               |                         |                  |                 | No                  | Storage       | Study Protocol   | Injecting           | 8456            |
| 17       |                           |                  |                 | 2                       |                  |                 | Yes                 | Transmission  | GHGRP-equivalent |                     | 27893           |
| 18       |                           | 6                |                 |                         | 1                |                 | No                  | Transmission  | Study Protocol   |                     | 11095           |
| 20       |                           |                  | 2               |                         |                  |                 | No                  | Storage       | Study Protocol   |                     | 8400            |
| 21       |                           |                  | 8               |                         |                  |                 | No                  | Transmission  | Study Protocol   |                     | 7040            |
| 22       |                           |                  |                 |                         |                  | 2               | Yes                 | Transmission  | Study Protocol   |                     | 7660            |
| 23       | 2                         | 2                | 3               |                         |                  |                 | No                  | Storage       | Study Protocol   | Injecting           | 19005           |
| 24       |                           |                  | 2               |                         |                  |                 | No                  | Transmission  | Study Protocol   |                     | 1904            |
| 25       | 2                         |                  |                 |                         | 3                |                 | Yes                 | Transmission  | Study Protocol   |                     | 33704           |
| 26       |                           |                  |                 | 1                       |                  |                 | No                  | Transmission  | GHGRP-equivalent |                     | 16000           |
| 27       |                           | 6                |                 |                         |                  |                 | No                  | Transmission  | Study Protocol   |                     | 6000            |
| 28       | 2                         |                  |                 |                         |                  |                 | No                  | Transmission  | Study Protocol   |                     | 1000            |
| 29       | 14                        |                  |                 |                         | 1                |                 | Yes                 | Transmission  | Study Protocol   |                     | 56975           |
| 30       |                           |                  |                 |                         | 4                | 2               | Yes                 | Transmission  | Study Protocol   |                     | 20180           |
| 31       |                           |                  |                 |                         |                  | 3               | Yes                 | Transmission  | Study Protocol   |                     | 13500           |
| 32       | 5                         | 3                | 5               |                         |                  |                 | Yes                 | Storage       | Study Protocol   | Injecting           | 28400           |
| 33       |                           |                  | 2               |                         |                  |                 | No                  | Transmission  | Study Protocol   |                     | 4740            |
| 34       |                           |                  |                 | 2                       |                  |                 | Yes                 | Transmission  | GHGRP-equivalent |                     | 40498           |
| 35       |                           |                  |                 |                         | 2                |                 | Yes                 | Transmission  | GHGRP-equivalent |                     | 32184           |
| 36       |                           |                  |                 |                         | 2                |                 | No                  | Transmission  | Study Protocol   |                     | 22700           |
| 37       |                           |                  |                 | 1                       | 2                |                 | Yes                 | Transmission  | GHGRP-equivalent |                     | 51763           |
| 39       |                           |                  |                 |                         |                  | 1               | Yes                 | Transmission  | GHGRP-equivalent |                     | 15600           |
| 40       |                           |                  |                 |                         | 2                |                 | Yes                 | Transmission  | GHGRP-equivalent |                     | 37012           |
| 41       |                           | 6                |                 |                         |                  |                 | No                  | Transmission  | Study Protocol   |                     | 6400            |
| 42       |                           |                  |                 |                         | 1                |                 | No                  | Transmission  | Study Protocol   |                     | 6280            |
| 43.1     | 5                         |                  |                 |                         |                  |                 | Yes                 | Transmission  | Study Protocol   | Quiescent           | 11120           |
| 43.2     | 4                         | 1                |                 |                         |                  |                 | Yes                 | Transmission  | Study Protocol   | Quiescent           | 11120           |
| 44       |                           | 1                | 4               |                         |                  |                 | Yes                 | Transmission  | Study Protocol   |                     | 26060           |
| 45       |                           | 3                | 3               |                         |                  |                 | Yes                 | Transmission  | Study Protocol   |                     | 31400           |
| 46       | 3                         |                  | 1               |                         |                  |                 | Yes                 | Transmission  | Study Protocol   |                     | 14750           |
| 47       | 1                         | 2                |                 |                         |                  |                 | Yes                 | Transmission  | GHGRP-equivalent |                     | 11600           |
| Total -> | 47                        | 47               | 42              | 12                      | 35               | 11              |                     |               |                  |                     |                 |

Note: Two sites (16 and 43) were sampled by both onsite emissions measurements and tracer flux in 2 distinct operating modes

<sup>1</sup>NOP = Standby (not operating) pressurized

<sup>2</sup>NOD = Standby (not operating) depressurized

<sup>3</sup>OP = Operating

## Onsite emissions measurements

As described in the text, two complementary measurement approaches were used in this study: direct onsite measurement of specific fugitive and vented emissions, and downwind tracer flux measurements of site-level methane emissions. The onsite measurements (and AP-42-based estimates of exhaust methane) are added up to the site-level Study Onsite Estimate. The onsite measurements are also used to calculate a GHGRP Estimate that calculates the emissions that would be reported under the EPA GHGRP. The three emission rates and their composition are summarized in Table S3. The onsite measurement protocol is described in this section.

**Table S3:** Composition of the different facility-level methane emissions estimates, broken down by EPA emissions class for the Study Onsite Estimate and GHGRP Estimate which are based on onsite measurements. Onsite measurements at storage sites are determined similarly, but storage sector tank emissions are not reported under EPA GHGRP, and are not included in the GHGRP Estimate for the storage sites. Blowdowns are excluded from all three estimates.

| Source Type                                            | Facility-Wide Emission Estimation Method |                        |                                                                 |
|--------------------------------------------------------|------------------------------------------|------------------------|-----------------------------------------------------------------|
|                                                        | GHGRP                                    | Study Onsite Estimate  | Tracer Flux                                                     |
| <b>Recip Compressor Venting (§98.233 (p))</b>          |                                          |                        | Quantifies Total Site-Wide Emissions at the Time of Measurement |
| Rod Packing/Vent                                       | Only if OP                               |                        |                                                                 |
| Blow Down Valve/Vent                                   | Only if OP or NOP                        | As Found: OP, NOP, NOD |                                                                 |
| Unit Isolation Valve                                   | Only if NOD                              |                        |                                                                 |
| <b>Centrifugal Compressor Venting (§98.233 (p))</b>    |                                          |                        |                                                                 |
| Wet Seal Degassing Vent                                | Only if OP                               |                        |                                                                 |
| Blow Down Valve/Vent                                   | Only if OP                               | As Found: OP, NOP, NOD |                                                                 |
| Unit Isolation Valve                                   | Only if NOD                              |                        |                                                                 |
| <b>Transmission Storage Tanks (Tanks (§98.233 (k))</b> |                                          |                        |                                                                 |
| Transmission Tanks                                     | DM*                                      | DM                     |                                                                 |
| <b>Pneumatic Device Venting (§98.233 (a))</b>          |                                          |                        |                                                                 |
| Pneumatics                                             | EF                                       | DM                     |                                                                 |
| <b>Equipment Leak Detection (§98.233 (q))</b>          |                                          |                        |                                                                 |
| Compressor Components                                  | EF                                       | DM                     |                                                                 |
| Non-Compressor Components                              | EF                                       | DM                     |                                                                 |
| <b>Other</b>                                           |                                          |                        |                                                                 |
| Methane in Combustion Exhaust                          | Reported as per Subpart C                | AP-42                  |                                                                 |
| Emitting but Inaccessible Sources                      | EF                                       | SF                     |                                                                 |
| <b>Total</b>                                           |                                          |                        |                                                                 |

Codes:

|     |                                                                        |
|-----|------------------------------------------------------------------------|
| OP  | Operating Pressurized (Direct Measurement)                             |
| NOD | Standby (Not Operating) Depressurized (Direct Measurement)             |
| NOP | Standby (Not Operating) Pressurized (Direct Measurement)               |
| EF  | EPA Prescribed Emission Factor                                         |
| SF  | Study Factor, Based on study average of same source type               |
| DM  | Direct Measurement                                                     |
| DM* | Direct Measurement if emission is detected for a duration of 5 minutes |

The comprehensive onsite survey was a two-step process. First, leak detection was performed using a FLIR GasFindIR™ or other thermal gas imaging camera. Second, methane emissions were directly measured from all detected emission points that were safely accessible within each facility. Extension poles, man-lifts, and/or scaffolding were used to quantify elevated sources. Engine and turbine exhaust emissions were not measured by the onsite survey; instead they were estimated with AP-42 emission factors (see SI section 5.)

Specific emission sources included reciprocating compressor vents, centrifugal compressor seals, compressor blowdown vents, transmission storage tanks, pneumatic devices, and fugitive leak components (valves, connectors, OELs, PRVs, regulators, meters, etc.). A Bacharach Hi-Flow® sampler was the primary measurement device, for emissions within the instrument range (0.05-10.5 SCFM). For higher flows, devices used included a rotary vane anemometer, calibrated bags, or turbine meters. Table S4 summarizes the detection limits for each device used in the onsite survey. Figure S2 shows the distribution of measurement type by each site.

**Table S4:** Onsite measurement instrument detection limits

| Instrument                        | Low Detection Limit  | High Detection Limit |
|-----------------------------------|----------------------|----------------------|
| Hi-Flow™                          | 0.05 cfm             | 10.5 cfm             |
| Turbine Meter W-series            | 0.2 cfm              | 392 cfm              |
| Turbine Meter GT-series           | 0.13 cfm             | 200 cfm              |
| Anemometer (velocity measurement) | 30 ft/min (0.15 m/s) | 4000 ft/min (20 m/s) |
| VPAC™                             | 0.035 cfm            | Not known            |
| Calibrated bag                    | Not found            | 240 cfm              |

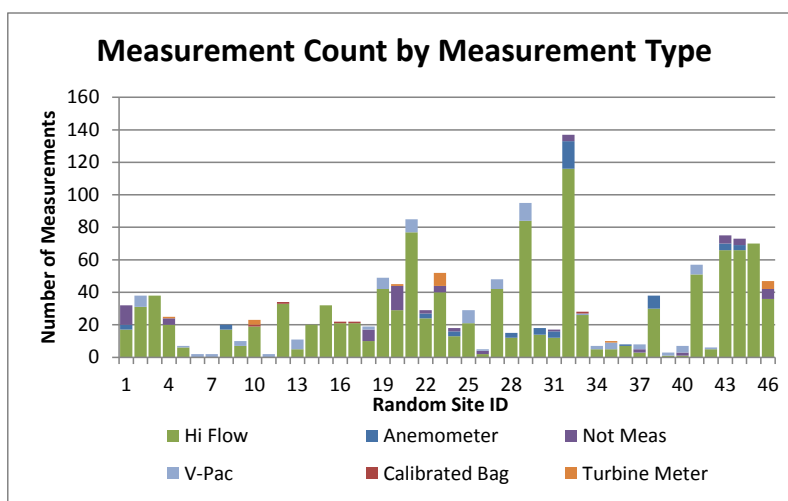

**Figure S2:** Measurement Count by Measurement Type, Random Site IDs

Table S5 shows the breakdown of onsite field measurements as a function of measurement method. By far the largest number of onsite emissions used the Hi-Flow<sup>TM</sup> instrument. However, the larger leaks were measured using anemometers, turbine meters, or calibrated bags.

**Table S5:** Count, total, and average onsite methane emissions by measurement method across 47 facilities in this study. Site 19 has been excluded for reasons explained in the text. “Estimate” refers to measurements that were detected by thermal imaging, but were below the detection limit of the Hi-Flow sampler. These were reported by the onsite team at the detection limit of the Hi-Flow sampler, and are included for completeness.

| Method                | Count | Total Emissions Measured Across All Sites (scfm) | Average Emissions (scfm) |
|-----------------------|-------|--------------------------------------------------|--------------------------|
| Anemometer            | 48    | 558                                              | 11.6                     |
| Hi-Flow <sup>TM</sup> | 1154  | 596                                              | 0.5                      |
| Calibrated bag        | 5     | 92                                               | 18.4                     |
| Turbine meter         | 18    | 190                                              | 10.6                     |
| Rotameter             | 1     | 0.07                                             |                          |
| VPAC <sup>TM</sup>    | 92    | 60                                               | 1.6                      |
| Not measured          | 65    |                                                  |                          |
| Estimate              | 80    | 8.0                                              |                          |

At 13 stations (Table S2), the Partner contractor only performed a less comprehensive GHGRP-compliant survey, not the more comprehensive study onsite protocol. There are two primary differences between these two onsite measurement protocols. First, the GHGRP surveys used acoustic devices (e.g. VPAC<sup>TM</sup>) to measure valve leaks. Although these devices are approved by the EPA to measure leaks across valves, they have been shown to underestimate leak rates (1) and therefore were excluded from the study onsite protocol. Second, the GHGRP-compliant surveys used infrared imaging for leak detection, but did not always make direct measurements of leaking components, since the GHGRP requires the use of approved emission factors for these leakers (Tables S6 and S7). In contrast, the study protocol required direct measurement of emissions from every identified leak. While the study onsite protocol required measurement of all vent emissions irrespective of the state (operating or standby), the GHGRP-compliant protocol did not report any emissions for standby/pressurized rod-packing vents since this source is excluded from the GHGRP.

The comparison between the SOE and tracer flux data indicate that the less comprehensive GHGRP survey compromised the data quality at least at Site #37, which had a leaky isolation valve (see detailed discussion in the main text.) At the other GHGRP-compliant survey sites, the impact is less clear. Excluding site #37, there was 20% discrepancy between the SOE and tracer flux of the aggregate methane emissions from the other 12 sites with GHGRP-compliant surveys (115 SCFM for aggregate SOE versus 140 SCFM for aggregate tracer flux). This bias is comparable to that associated with the use of the GHGRP emission factors discussed in the GHGRP / SOE comparison section of the main text. Table S2 indicates that twelve of the thirteen sites with the less comprehensive GHGRP survey had

centrifugal compressors. Nine of these were centrifugal-only sites on standby, which is the majority of this class of sites (9 out of 14). However, comparisons between tracer flux and SOE for this set of sites (centrifugal standby; main text Figure 3) suggests that the trends are robust, and the use of less-comprehensive GHGRP-compliant surveys was not a significant factor at most of these lower-emitting sites (except superemitter Site #37.)

### Calculation of GHGRP-equivalent estimate

The onsite measurements can be used to calculate the facility emissions that would be reported to the EPA under GHGRP. The GHGRP-equivalent estimates (not to be confused with the GHGRP-compliant onsite surveys described earlier) were derived from all the onsite data and following the procedures in 40 CFR §98 Subpart C and Subpart W, as summarized in Table S3.

For gas-driven pneumatic devices, emissions were calculated based on company-supplied device population counts (distinguished by bleed mode) and using the EPA methane emission factors listed in Table S6. For equipment leaks, emissions were calculated based on IR survey leak detection (counts of detected leaks) and the EPA methane emission factors shown in in Table S7. The data for Tables S6 and S7 are from CFR Title 40, Part 98, Subpart W, Table W-3 (2). Transmission storage tank emission measurements (natural gas transmission sites only) require reporting only if the leak is detectable by the IR survey for a minimum of five minutes.

**Table S6:** Natural Gas Pneumatic Emission Factors (2)

| Count     | High Bleed  | Low Bleed   | Intermittent |
|-----------|-------------|-------------|--------------|
| # Devices | 18.2        | 1.37        | 2.35         |
|           | scfh/device | scfh/device | scfh/device  |

**Table S7:** Natural Gas Equipment Leak Emission Factors (2)

| Leaker                | Compressor Component | Non Compressor Component |
|-----------------------|----------------------|--------------------------|
| Valve                 | 14.84 scfh/device    | 6.42 scfh/device         |
| Connector             | 5.59 scfh/device     | 5.71 scfh/device         |
| Open-ended line       | 17.27 scfh/device    | 11.27 scfh/device        |
| Pressure relief valve | 39.66 scfh/device    | 2.01 scfh/device         |
| Meter                 | 19.33 scfh/device    | 2.93 scfh/device         |

### Tracer Flux measurements: method details and uncertainty estimation

The tracer flux method used by this study is described in detail by Roscioli et al. Here we provide some additional study-specific details. The tracers were nitrous oxide ( $\text{N}_2\text{O}$ ) and acetylene ( $\text{C}_2\text{H}_2$ ). Nitrous oxide was typically released onsite at flow rates between 25-45 SLPM (1 atm, 298 K), while acetylene was limited to a flow rate of 15 SLPM due to safety considerations. These two tracers were chosen because they are widely-available industrial gases, and can be measured accurately at 1-Hz time



resolution or faster. (The 1996 GRI/EPA study used sulfur hexafluoride, which has a GWP100 of 22,800 compared to 298 for N<sub>2</sub>O, and hence was not used in this study.)

Key assumptions of the tracer flux method are 1) that the methane and tracers undergo equivalent dispersion; 2) that there are no unintentional sources of the tracer; and 3) that background-corrected methane concentrations are only due to emissions from the target site. These were evaluated by using two tracers; measuring upwind and downwind transects with tracer release turned off; and by comparing the plume ethane/methane ratios with Partner company-provided gas composition data. Upwind and downwind transects at the facilities, conducted when no tracers were flowing, showed no significant sources of nitrous oxide and acetylene at these sites. The ethane/methane data are discussed in the main text.

For this study, the mobile laboratory made continuous measurements of methane, ethane, and tracer concentrations at various distances downwind of the source. CMU used a dual-laser Aerodyne Quantum Cascade Tunable Infrared Laser Differential Absorption Spectroscopy (QC-TILDAS) instrument to measure ethane, nitrous oxide, and carbon monoxide at 1-Hz and a Picarro cavity ringdown spectroscopy (CRDS) instrument for methane and acetylene at 3-5 Hz. ARI used three Aerodyne TILDAS instruments for the same set of species. Minimum detection limits were: CH<sub>4</sub> 5 ppb, C<sub>2</sub>H<sub>2</sub> 0.5 ppb, N<sub>2</sub>O 0.2 ppb, C<sub>2</sub>H<sub>6</sub> 0.3 ppb. Sharp CO spikes indicated interference from passing vehicular traffic; these plumes were eliminated from the analysis. The sampling protocol included daily span and zero checks, with the calibration verified once each day, and a zero every fifteen minutes. All data were post-processed at a 1-Hz time resolution.

#### **Uncertainty Estimation:**

The Aerodyne (ARI) and Carnegie Mellon University (CMU) teams used two different but complementary empirical approaches to estimate the uncertainty associated with the tracer flux data. Most of the sites sampled by ARI were found in a single state (typically not operating) all through the tracer flux measurements. This meant that the methane facility-level emission rate (FLER) was stable over the measurement period and the plume-to-plume variability of the estimated emissions provides an estimate of the uncertainty of the measurements. Many of the CMU sites included operating compressors, which meant that the facility methane emissions often varied through the day. So the method precision was determined by comparing the recovery rate of the second tracer in dual tracer correlation plumes sampled by the CMU team in the field. As shown later, the method precision (uncertainty) on dual tracer correlation plumes were found to be similar for two approaches. This lends greater confidence to these empirical uncertainty estimates.

The ARI method of determining method precision consists of the following steps:

1. For all plumes of a certain type at a given facility, calculate the relative deviation (RD) from the method-specific mean emission rate for each plume as:

$$RD_i = (FLER_i - FLER_{avg,method}) / FLER_{avg,method}$$

2. Plot a histogram of the relative deviations for all plumes of a given type across all sites (Figure S3).

3. The method-specific precision is the standard deviation of the histogram.

Figure S3 illustrates the ARI data for dual correlation plumes. These are data for all the sites that were on standby (not operating.)

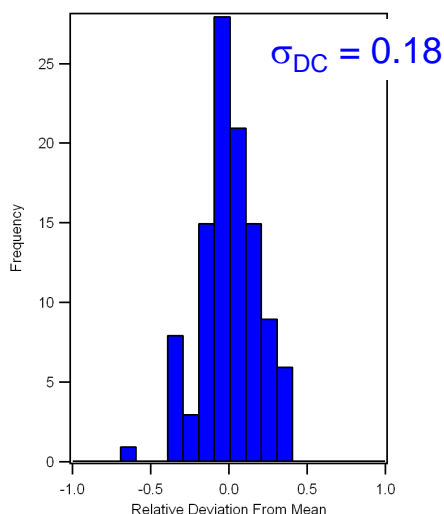

**Figure S3:** Distribution of relative deviation from mean for plumes measured at non-operating sites using two tracers. The standard deviation of this distribution is 18%.

For the CMU dual tracer correlation plumes, the relative error in recovery was calculated as the difference between the  $\text{N}_2\text{O}/\text{C}_2\text{H}_2$  slope of the captured downwind plume and the onsite release ratio for all recovered plumes. A cumulative distribution of the relative errors for the 167 dual-correlation plumes is shown in **Figure S4**. For 109 plumes where the two tracers were recovered to within  $\pm 50\%$  of the onsite release ratio (the “good ratio” of 1.5), sixty-eight percent of the plumes fall within  $\pm 24\%$ . (For all 167 dual correlation plumes, the relative error for the recovery of the two tracers is  $\pm 40\%$ .) For dual tracer plumes, the methane FLER is calculated using the average of the FLERs based on the  $\text{CH}_4/\text{N}_2\text{O}$  and  $\text{CH}_4/\text{C}_2\text{H}_2$  regression slopes, and thus, each dual tracer correlation result is the product of two independent measurements of the methane FLER. Therefore, the 1 SD error in the  $\text{CH}_4$  FLER from dual tracer correlation plumes is estimated to be 17% ( $24\%/\sqrt{2}$ ), which is essentially the same as the uncertainty for similar plumes sampled by Aerodyne.

Similar analyses to that shown in Figure S3 and S4 were performed for the three different types of plumes. The resulting uncertainties are summarized in Table S8.

**Table S8:** Uncertainties (1- $\sigma$ ) on site-level methane emission rates calculated from individual tracer flux plumes.

| Plume Type                | Plumes sampled by CMU lab | Plumes sampled by ARI lab |
|---------------------------|---------------------------|---------------------------|
| Dual tracer correlation   | 17%                       | 21%                       |
| Dual tracer area          | 34%                       | 34%                       |
| Single tracer correlation | 34%                       | 19%                       |

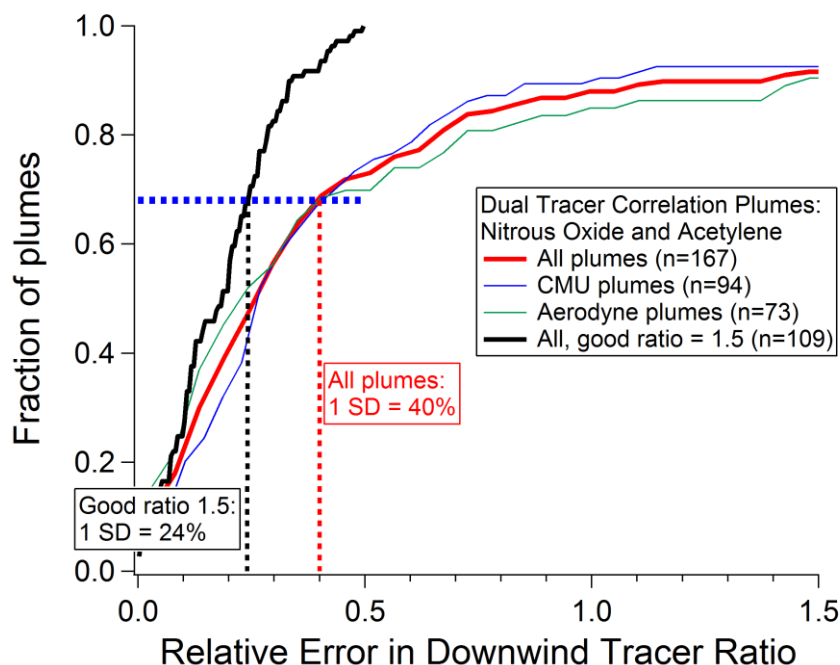

**Figure S4:** Cumulative distribution of the relative error in recovery of the secondary tracer for 167 dual tracer correlation plumes.

### Estimation of AP42-based exhaust methane emissions

“Combustion” methane emissions refer to un-burned methane in the engine or turbine exhaust. These emissions are distinct and separate from compressor emissions such as rod packing vents in reciprocating compressors or seal vents in centrifugal compressors. These emissions were not characterized as part of the study onsite emissions measurements, but would be captured by the downwind tracer flux technique, which characterizes emissions from the entire facility. Therefore, we estimated the combustion methane emissions using US EPA AP-42 emission factors.

The EPA AP42 emissions factors differentiate different types of prime movers, including 2-stroke lean-burn, 4-stroke lean-burn, 4-stroke rich-burn, and industrial gas turbines, which have very different emissions rates for a similar fuel input due to fundamental design differences. In contrast, Subpart-C of the EPA’s Greenhouse Gas Reporting Program lists one emission factor for all stationary combustion sources.

Combustion methane emissions in the Study Onsite Estimate are estimated as the product of the EPA AP42 emissions factor for the appropriate prime mover type (2-stroke lean-burn, 4-stroke lean-burn, 4-stroke rich-burn, and industrial gas turbines) and fuel flow rate. Fuel consumption data were not available so it was estimated based on the full rated horsepower of the unit divided by a representative thermal efficiency to determine heat input. Representative thermal efficiencies were obtained from a survey of manufacturer data for each prime mover type. The assumption that the units were operating at full rated load based results in an upper bound estimate (assuming the AP42 emission factors are

accurate). This calculation was performed for each operating unit and then results were combined with the other data to determine the study onsite estimate for each site.

AP42 emission factors represent emissions from uncontrolled combustion sources, meaning that they do not account for exhaust after-treatment such as catalysts. This was true for 17 of the 22 study sites with operating engines. However, five sites had catalysts on one or more engines, including three sites with oxidation catalysts, and one with a non-selective catalytic reduction (NSCR) catalyst. Only one of these sites (#10) had dual-paired tracer flux and study onsite emissions measurements with the facility in the same operating state, and with significant exhaust emissions (75 SCFM from 4 2-cycle lean-burn engines, of which three have oxidation catalysts) based on AP42. However, oxidation catalysts are used largely for the removal of CO in lean-burn engines, and are expected to have little effect on methane emissions at the low exhaust temperatures found in lean burn engines. Methane conversion in Platinum and Platinum/Palladium based oxidation catalysts has been shown to decrease substantially in the first 10 hours of use in a natural gas fueled engine.(3) Palladium based oxidation catalysts tend to exhibit better initial methane conversion than platinum based catalysts, but lose activity towards methane rapidly in the presence of water vapor, H<sub>2</sub>S, and SO<sub>2</sub>. (4)

## References

1. Harrison, M.R., Galloway, K.E., Hendler, A., Shires, T.M., Allen, D.T., Foss, M., Thomas, J., and Spinhirne, J. (2011). "Natural Gas Industry Methane Emission Factor Improvement Study: Draft Final Report." Cooperative Agreement No. XA-83376101, US EPA.
2. [http://www.ecfr.gov/cgi-bin/text-idx?SID=b8a88f60ba42027dc530087067ad4a0f&node=ap40.21.98\\_1238.6&rqn=div9](http://www.ecfr.gov/cgi-bin/text-idx?SID=b8a88f60ba42027dc530087067ad4a0f&node=ap40.21.98_1238.6&rqn=div9)
3. McCormick, R., Newlin, A., Mowery, D., Graboski, M. et al. (1996). "Rapid Deactivation of Lean-Burn Natural Gas Engine Exhaust Oxidation Catalysts," SAE Technical Paper 961976, doi:10.4271/961976
4. Mowery, D.L., Graboski, M.S., Ohno, T.R., and R.L. McCormick (1999). "Deactivation of PdO–Al<sub>2</sub>O<sub>3</sub> oxidation catalyst in lean-burn natural gas engine exhaust: aged catalyst characterization and studies of poisoning by H<sub>2</sub>O and SO<sub>2</sub>." Applied Catalysis B: Environmental, 21(3):157-169, DOI: 10.1016/S0926-3373(99)00017-X

## Data Tables

Table S9 shows the site-level summary measurements for the onsite and downwind tracer flux measurements. The Study Onsite Estimate consists of direct onsite measurements and AP-42-based exhaust emission estimates. The GHGRP Estimate is the sum of emissions reported as per Subpart W (fugitive and vented emissions) and Subpart C (exhaust emissions.) Tables S10 and S11 show the detailed calculation of the Study Onsite Estimate (less AP-42) and the GHGRP Estimate based on the onsite measurements, study factors (when detected leaks could not be measured because they were not safely accessible), and for the GHGRP Estimate, EPA emission factors from Tables S6 and S7 for pneumatic devices and component leakers.

**Table S9:** Site-level methane emissions data: Study Onsite Estimate (SOE), GHGRP-equivalent estimate, and Tracer Flux.

| Site # | Subpart-W (SCFM) | Subpart-C (SCFM) | GHGRP Estimate (SCFM) | Study Onsite Estimate (No AP42) (SCFM) | AP-42-based exhaust emissions (SCFM) | Study Onsite Estimate (SCFM) | Tracer Flux (SCFM) | Tracer Flux Uncertainty (1 standard error) (SCFM) | Tracer Flux Relative Standard Error | Total number of valid plumes | TF/ onsite in same mode? (1=yes) |
|--------|------------------|------------------|-----------------------|----------------------------------------|--------------------------------------|------------------------------|--------------------|---------------------------------------------------|-------------------------------------|------------------------------|----------------------------------|
| 1      | 53.10            | 0.00             | 53.10                 | 85.75                                  | 0.00                                 | 85.75                        | 100.01             | 9.13                                              | 9%                                  | 4                            | 0                                |
| 2      | 9.89             | 0.00             | 9.89                  | 10.63                                  | 0.00                                 | 10.63                        | 56.63              | 2.57                                              | 5%                                  | 10                           | 1                                |
| 3      | 16.31            | 0.00             | 16.31                 | 15.98                                  | 0.00                                 | 15.98                        | 14.20              | 12.18                                             | 86%                                 | 2                            | 0                                |
| 4      | 15.20            | 0.00             | 15.20                 | 20.98                                  | 0.00                                 | 20.98                        | 15.84              | 1.40                                              | 9%                                  | 16                           | 1                                |
| 5      | 1.04             | 0.00             | 1.04                  | 0.72                                   | 0.00                                 | 0.72                         | 2.44               | 0.15                                              | 6%                                  | 2                            | 1                                |
| 6      | 0.00             | 0.00             | 0.00                  | 0.00                                   | 0.00                                 | 0.00                         | 3.00               | 0.38                                              | 13%                                 | 6                            | 1                                |
| 7      | 2.55             | 0.25             | 2.80                  | 2.55                                   | 0.97                                 | 3.52                         |                    |                                                   |                                     |                              | 0                                |
| 8      | 18.16            | 0.04             | 18.20                 | 25.63                                  | 0.14                                 | 25.77                        | 71.62              | 4.94                                              | 7%                                  | 5                            | 1                                |
| 9      | 0.50             | 0.00             | 0.50                  | 1.62                                   | 0.00                                 | 1.62                         | 16.30              | 2.77                                              | 17%                                 | 5                            | 1                                |
| 10     | 63.22            | 0.12             | 63.34                 | 106.47                                 | 59.63                                | 166.10                       | 114.58             | 13.36                                             | 12%                                 | 6                            | 1                                |
| 11     | 0.02             | 0.25             | 0.27                  | 0.02                                   | 0.97                                 | 0.99                         | 4.84               | 1.43                                              | 30%                                 | 2                            | 1                                |
| 12     | 18.97            | 0.05             | 19.02                 | 48.44                                  | 35.32                                | 83.76                        | 74.60              | 2.35                                              | 3%                                  | 16                           | 1                                |
| 13     | 0.48             | 0.00             | 0.48                  | 1.07                                   | 0.00                                 | 1.07                         | 1.70               | 0.53                                              | 31%                                 | 2                            | 1                                |
| 14     | 3.87             | 0.00             | 3.87                  | 3.98                                   | 0.00                                 | 3.98                         | 318.12             | 156.39                                            | 49%                                 | 19                           | 1                                |
| 15     | 40.47            | 0.03             | 40.50                 | 40.52                                  | 14.56                                | 55.08                        | 61.56              | 22.78                                             | 37%                                 | 7                            | 1                                |

| Site # | Subpart-W (SCFM) | Subpart-C (SCFM) | GHGRP Estimate (SCFM) | Study Onsite Estimate (No AP42) (SCFM) | AP-42-based exhaust emissions (SCFM) | Study Onsite Estimate (SCFM) | Tracer Flux (SCFM) | Tracer Flux Uncertainty (1 standard error) (SCFM) | Tracer Flux Relative Standard Error | Total number of valid plumes | TF/ onsite in same mode? (1=yes) |
|--------|------------------|------------------|-----------------------|----------------------------------------|--------------------------------------|------------------------------|--------------------|---------------------------------------------------|-------------------------------------|------------------------------|----------------------------------|
| 16.1   | 3.19             | 0.00             | 3.19                  | 38.44                                  | 0.00                                 | 38.44                        | 35.03              | 2.64                                              | 8%                                  | 19                           | 1                                |
| 16.2   | 4.63             | 0.02             | 4.65                  | 39.32                                  | 13.76                                | 53.09                        | 48.78              | 8.21                                              | 17%                                 | 8                            | 1                                |
| 17     | 1.45             | 0.00             | 1.45                  | 3.97                                   | 0.00                                 | 3.97                         | 13.57              | 0.26                                              | 2%                                  | 6                            | 1                                |
| 18     | 9.98             | 0.00             | 9.98                  | 8.29                                   | 0.00                                 | 8.29                         | 8.72               | 1.30                                              | 15%                                 | 7                            | 1                                |
| 20     | 22.81            | 0.05             | 22.86                 | 37.45                                  | 32.30                                | 69.75                        | 95.68              | 5.22                                              | 5%                                  | 6                            | 1                                |
| 21     | 14.53            | 0.05             | 14.58                 | 8.44                                   | 5.22                                 | 13.66                        |                    |                                                   |                                     |                              | 0                                |
| 22     | 83.11            | 0.07             | 83.18                 | 83.56                                  | 0.27                                 | 83.83                        | 8.61               | 0.89                                              | 10%                                 | 4                            | 1                                |
| 23     | 35.64            | 0.02             | 35.66                 | 54.31                                  | 14.35                                | 68.66                        | 53.23              | 3.61                                              | 7%                                  | 8                            | 0                                |
| 24     | 18.48            | 0.01             | 18.49                 | 23.04                                  | 6.69                                 | 29.73                        |                    |                                                   |                                     |                              | 0                                |
| 25     | 12.26            | 0.00             | 12.26                 | 10.87                                  | 0.00                                 | 10.87                        | 45.61              | 3.70                                              | 8%                                  | 3                            | 1                                |
| 26     | 0.59             | 0.00             | 0.59                  | 1.18                                   | 0.00                                 | 1.18                         | 2.03               | 0.22                                              | 11%                                 | 5                            | 1                                |
| 27     | 6.94             | 0.00             | 6.94                  | 10.58                                  | 0.00                                 | 10.58                        | 23.03              | 3.87                                              | 17%                                 | 3                            | 1                                |
| 28     | 4.91             | 0.00             | 4.91                  | 15.39                                  | 0.00                                 | 15.39                        | 2.88               | 0.14                                              | 5%                                  | 14                           | 1                                |
| 29     | 24.59            | 0.00             | 24.59                 | 55.65                                  | 0.00                                 | 55.65                        | 61.78              | 3.92                                              | 6%                                  | 9                            | 1                                |
| 30     | 67.74            | 0.02             | 67.76                 | 68.66                                  | 0.07                                 | 68.73                        | 54.79              | 7.28                                              | 13%                                 | 4                            | 1                                |
| 31     | 116.84           | 0.10             | 116.95                | 117.63                                 | 0.40                                 | 118.04                       | 75.34              | 1.88                                              | 2%                                  | 3                            | 1                                |
| 32     | 95.61            | 0.07             | 95.68                 | 129.89                                 | 45.69                                | 175.58                       | 121.62             | 12.77                                             | 10%                                 | 14                           | 1                                |
| 33     | 63.27            | 0.03             | 63.30                 | 61.82                                  | 16.59                                | 78.41                        |                    |                                                   |                                     |                              | 0                                |
| 34     | 0.70             | 0.00             | 0.70                  | 1.01                                   | 0.00                                 | 1.01                         | 9.58               | 0.16                                              | 2%                                  | 15                           | 1                                |
| 35     | 36.15            | 0.00             | 36.15                 | 39.28                                  | 0.00                                 | 39.28                        | 16.88              | 2.69                                              | 16%                                 | 3                            | 1                                |
| 36     | 14.80            | 0.00             | 14.80                 | 14.79                                  | 0.00                                 | 14.79                        | 1.66               | 0.21                                              | 13%                                 | 6                            | 1                                |
| 37     | 14.18            | 0.00             | 14.18                 | 14.61                                  | 0.00                                 | 14.61                        | 875.93             | 119.35                                            | 14%                                 | 9                            | 1                                |
| 39     | 0.07             | 0.21             | 0.28                  | 0.11                                   | 0.81                                 | 0.93                         | 3.76               | 1.17                                              | 31%                                 | 1                            | 1                                |
| 40     | 50.33            | 0.00             | 50.33                 | 50.41                                  | 0.00                                 | 50.41                        | 26.84              | 3.71                                              | 14%                                 | 10                           | 1                                |
| 41     | 7.61             | 0.00             | 7.61                  | 6.22                                   | 0.00                                 | 6.22                         | 13.58              | 1.31                                              | 10%                                 | 10                           | 1                                |
| 42     | 9.14             | 0.00             | 9.14                  | 7.83                                   | 0.00                                 | 7.83                         | 6.70               | 0.46                                              | 7%                                  | 14                           | 1                                |

| Site # | Subpart-W (SCFM) | Subpart-C (SCFM) | GHGRP Estimate (SCFM) | Study Onsite Estimate (No AP42) (SCFM) | AP-42-based exhaust emissions (SCFM) | Study Onsite Estimate (SCFM) | Tracer Flux (SCFM) | Tracer Flux Uncertainty (1 standard error) (SCFM) | Tracer Flux Relative Standard Error | Total number of valid plumes | TF/ onsite in same mode? (1=yes) |
|--------|------------------|------------------|-----------------------|----------------------------------------|--------------------------------------|------------------------------|--------------------|---------------------------------------------------|-------------------------------------|------------------------------|----------------------------------|
| 43.1   | 28.70            | 0.00             | 28.70                 | 91.17                                  | 0.00                                 | 91.17                        | 59.77              | 5.46                                              | 9%                                  | 18                           | 1                                |
| 43.2   | 26.72            | 0.00             | 26.72                 | 63.44                                  | 0.00                                 | 63.44                        | 74.87              | 8.14                                              | 11%                                 | 9                            | 1                                |
| 44     | 98.24            | 0.11             | 98.35                 | 104.17                                 | 73.44                                | 177.61                       | 126.48             | 16.80                                             | 13%                                 | 9                            | 1                                |
| 45     | 7.75             | 0.16             | 7.90                  | 79.62                                  | 102.65                               | 182.27                       | 145.84             | 12.45                                             | 9%                                  | 11                           | 1                                |
| 46     | 21.49            | 0.05             | 21.54                 | 36.73                                  | 30.60                                | 67.33                        | 78.20              | 7.77                                              | 10%                                 | 7                            | 1                                |
| 47     | 0.27             | 0.00             | 0.27                  | 0.00                                   | 0.00                                 | 0.00                         | 41.04              | 4.66                                              | 11%                                 | 7                            | 1                                |

1

2

1 **Table S10:** Onsite Emissions Data at Each Compressor Facility used to calculate Study Onsite Estimate (excluding exhaust methane emissions)

|              |                 | Reciprocating Rod Packing |                        |                     |                        | Centrifugal/ Wet Seal |                        |                     |                        | Reciprocating Unit Blowdown Valve/Vent |                        |                     |                        | Centrifugal Unit Blowdown Valve/Vent |                        |                     |                        | Reciprocating Isolation Valve |                        | Centrifugal Isolation Valve |                        | Storage Tanks |                        |
|--------------|-----------------|---------------------------|------------------------|---------------------|------------------------|-----------------------|------------------------|---------------------|------------------------|----------------------------------------|------------------------|---------------------|------------------------|--------------------------------------|------------------------|---------------------|------------------------|-------------------------------|------------------------|-----------------------------|------------------------|---------------|------------------------|
|              |                 | Operating                 |                        | Standby Pressurized |                        | Operating             |                        | Standby Pressurized |                        | Operating                              |                        | Standby Pressurized |                        | Operating                            |                        | Standby Pressurized |                        | Standby Depressured           |                        | Standby Depressured         |                        |               |                        |
|              |                 | Number                    | Total Emissions (SCFM) | Number              | Total Emissions (SCFM) | Number                | Total Emissions (SCFM) | Number              | Total Emissions (SCFM) | Number                                 | Total Emissions (SCFM) | Number              | Total Emissions (SCFM) | Number                               | Total Emissions (SCFM) | Number              | Total Emissions (SCFM) | Number                        | Total Emissions (SCFM) | Number                      | Total Emissions (SCFM) | Number        | Total Emissions (SCFM) |
|              | 1 Storage       |                           |                        | 5                   | Study Factor           |                       |                        |                     |                        |                                        | 5                      | 28.0                |                        |                                      |                        |                     | 2                      | 5.6                           | 1                      | 13.8                        |                        |               |                        |
|              | 2 Transmission  |                           |                        |                     |                        |                       |                        |                     |                        |                                        |                        |                     |                        |                                      |                        |                     | 8                      | 2.8                           |                        |                             |                        |               |                        |
|              | 3 Transmission  |                           |                        |                     |                        |                       |                        |                     |                        |                                        |                        |                     |                        |                                      |                        |                     |                        |                               | 2                      | 0.0                         | 2                      | 11.9          |                        |
|              | 4 Transmission  |                           |                        |                     |                        |                       |                        |                     |                        |                                        |                        |                     |                        |                                      |                        |                     |                        |                               | 9                      | 12.9                        |                        |               |                        |
|              | 5 Transmission  |                           |                        |                     |                        |                       |                        |                     |                        |                                        |                        |                     |                        |                                      |                        |                     |                        |                               | 1                      | 0.0                         | 1                      | 0.0           |                        |
|              | 6 Transmission  |                           |                        |                     |                        |                       |                        |                     |                        |                                        |                        |                     |                        | 2                                    | 0.00                   |                     |                        |                               |                        |                             |                        |               |                        |
|              | 7 Transmission  |                           |                        |                     |                        |                       |                        |                     |                        |                                        |                        | 1                   | 2.6                    |                                      |                        |                     |                        |                               |                        |                             |                        |               |                        |
|              | 8 Transmission  |                           |                        |                     |                        | 1                     | 0.9                    |                     |                        |                                        |                        | 1                   | 7.7                    |                                      |                        |                     |                        |                               | 1                      | 7.7                         | 1                      | 0.0           |                        |
|              | 9 Transmission  |                           |                        |                     |                        |                       |                        |                     |                        |                                        |                        |                     |                        | 3                                    | 0.02                   |                     |                        |                               |                        |                             |                        |               |                        |
|              | 10 Transmission | 4                         | 8.3                    | 1                   | 1.4                    |                       |                        |                     |                        | 4                                      | 51.3                   | 1                   | 0.0                    |                                      |                        | 1                   | 0.0                    | 1                             | 2.0                    |                             |                        |               |                        |
|              | 11 Transmission |                           |                        |                     |                        |                       |                        |                     |                        |                                        |                        | 1                   | 0.0                    |                                      |                        |                     |                        |                               |                        |                             |                        |               |                        |
|              | 12 Transmission | 3                         | 14.8                   |                     |                        |                       |                        |                     |                        |                                        |                        |                     |                        |                                      |                        |                     |                        |                               |                        |                             |                        |               |                        |
|              | 13 Transmission |                           |                        |                     |                        |                       |                        |                     |                        |                                        |                        |                     |                        | 1                                    | 0.01                   |                     |                        |                               | 2                      | 0.0                         |                        |               |                        |
|              | 14 Storage      |                           |                        |                     |                        |                       |                        |                     |                        |                                        |                        |                     |                        |                                      |                        |                     | 6                      | 0.0                           |                        |                             |                        |               |                        |
|              | 15 Storage      | 4                         | 10.9                   |                     |                        |                       |                        |                     |                        | 4                                      | 23.3                   |                     |                        |                                      |                        |                     |                        |                               |                        |                             |                        |               |                        |
|              | 16.1 Storage    |                           |                        | 2                   | 27.2                   |                       |                        |                     |                        | 2                                      | 0.0                    |                     |                        |                                      |                        |                     |                        |                               |                        |                             |                        |               |                        |
|              | 16.2 Storage    | 1                         | 1.4                    | 1                   | 26.6                   |                       |                        |                     |                        | 1                                      | 0.0                    | 1                   | 0.0                    |                                      |                        |                     |                        |                               |                        |                             |                        |               |                        |
|              | 17 Transmission |                           |                        |                     |                        |                       |                        |                     |                        |                                        |                        |                     |                        | 2                                    | 0.00                   |                     |                        |                               |                        |                             |                        |               |                        |
|              | 18 Transmission |                           |                        |                     |                        |                       |                        |                     |                        |                                        |                        |                     |                        |                                      |                        |                     | 6                      | 0.0                           | 1                      | 0.0                         |                        |               |                        |
|              | 20 Storage      | 2                         | Study Factor           |                     |                        |                       |                        |                     |                        | 2                                      | Study Factor           |                     |                        |                                      |                        |                     |                        |                               |                        |                             |                        |               |                        |
|              | 21 Transmission | 8                         | 0.7                    |                     |                        |                       |                        |                     |                        | 8                                      | 0.0                    |                     |                        |                                      |                        |                     |                        |                               |                        |                             |                        |               |                        |
|              | 22 Transmission |                           |                        |                     |                        | 2                     | 79.8                   |                     |                        |                                        |                        |                     | 2                      | 0.0                                  |                        |                     |                        |                               |                        |                             | 1                      | 0.7           |                        |
|              | 23 Storage      | 3                         | 6.3                    | 2                   | 11.5                   |                       |                        |                     |                        | 3                                      | 16.4                   | 2                   | 8.6                    |                                      |                        |                     | 2                      | 1.8                           |                        |                             |                        |               |                        |
|              | 24 Transmission | 2                         | 16.3                   |                     |                        |                       |                        |                     |                        |                                        |                        |                     |                        |                                      |                        |                     |                        |                               |                        |                             | 1                      | 0.2           |                        |
|              | 25 Transmission |                           |                        | 2                   | 4.2                    |                       |                        |                     |                        |                                        | 2                      | 0.1                 |                        |                                      |                        |                     |                        |                               | 3                      | 0.9                         | 1                      | 4.3           |                        |
|              | 26 Transmission |                           |                        |                     |                        |                       |                        |                     |                        |                                        |                        |                     |                        |                                      | 1                      | 0.00                |                        |                               |                        |                             |                        |               |                        |
|              | 27 Transmission |                           |                        |                     |                        |                       |                        |                     |                        |                                        |                        |                     |                        |                                      |                        |                     | 6                      | 0.0                           |                        |                             |                        |               |                        |
|              | 28 Transmission |                           |                        | 2                   | 11.5                   |                       |                        |                     |                        | 2                                      | 3.3                    |                     |                        |                                      |                        |                     |                        |                               |                        |                             |                        |               |                        |
|              | 29 Transmission |                           |                        | 14                  | 33.3                   |                       |                        |                     |                        | 14                                     | 2.6                    |                     |                        |                                      |                        |                     |                        |                               | 1                      | 0.0                         | 3                      | 3.8           |                        |
|              | 30 Transmission |                           |                        |                     |                        | 2                     | 63.3                   |                     |                        |                                        |                        |                     | 2                      | 0.0                                  |                        |                     |                        |                               | 4                      | 2.2                         |                        |               |                        |
|              | 31 Transmission |                           |                        |                     |                        | 3                     | 66.8                   |                     |                        |                                        |                        |                     | 3                      | 48.6                                 |                        |                     |                        |                               |                        |                             |                        |               |                        |
|              | 32 Storage      | 5                         | 27.5                   | 5                   | 18.2                   |                       |                        |                     |                        | 5                                      | 7.7                    | 5                   | 28.4                   |                                      |                        |                     | 3                      | 3.1                           |                        |                             |                        | 3             | 7.2                    |
|              | 33 Transmission | 2                         | 57.0                   |                     |                        |                       |                        |                     |                        | 2                                      | 1.9                    |                     |                        |                                      |                        |                     |                        |                               |                        |                             |                        |               |                        |
|              | 34 Transmission |                           |                        |                     |                        |                       |                        |                     |                        |                                        |                        |                     |                        |                                      | 2                      | 0.02                |                        |                               |                        |                             |                        |               |                        |
|              | 35 Transmission |                           |                        |                     |                        |                       |                        |                     |                        |                                        |                        |                     |                        |                                      |                        |                     |                        |                               | 2                      | 36.0                        |                        |               |                        |
|              | 36 Transmission |                           |                        |                     |                        |                       |                        |                     |                        |                                        |                        |                     |                        |                                      |                        |                     |                        |                               | 2                      | 14.2                        |                        |               |                        |
|              | 37 Transmission |                           |                        |                     |                        |                       |                        |                     |                        |                                        |                        |                     |                        | 1                                    | 0.00                   |                     |                        |                               | 2                      | 6.0                         |                        |               |                        |
|              | 39 Transmission |                           |                        |                     |                        |                       |                        |                     |                        |                                        |                        |                     | 1                      | 0.1                                  |                        |                     |                        |                               |                        |                             |                        |               |                        |
|              | 40 Transmission |                           |                        |                     |                        |                       |                        |                     |                        |                                        |                        |                     |                        |                                      |                        |                     |                        |                               | 2                      | 42.8                        |                        |               |                        |
|              | 41 Transmission |                           |                        |                     |                        |                       |                        |                     |                        |                                        |                        |                     |                        |                                      |                        |                     | 6                      | 0.0                           |                        |                             |                        |               |                        |
|              | 42 Transmission |                           |                        |                     |                        |                       |                        |                     |                        |                                        |                        |                     |                        |                                      |                        |                     |                        |                               | 1                      | 0.0                         | 1                      | 7.5           |                        |
|              | 43.1 Storage    |                           |                        | 5                   | 60.2                   |                       |                        |                     |                        | 5                                      | Study Factor           |                     |                        |                                      |                        |                     |                        |                               |                        |                             | 1                      | 2.9           |                        |
|              | 43.2 Storage    |                           |                        | 4                   | 34.4                   |                       |                        |                     |                        | 4                                      | Study Factor           |                     |                        |                                      |                        |                     |                        |                               | 1                      | 0.0                         | 1                      | 2.9           |                        |
|              | 44 Transmission | 4                         | 14.2                   |                     |                        |                       |                        |                     |                        | 4                                      | 75.7                   |                     |                        |                                      |                        |                     |                        |                               | 1                      | 0.3                         |                        |               |                        |
|              | 45 Transmission | 3                         | 0.1                    |                     |                        |                       |                        |                     |                        |                                        |                        |                     |                        |                                      |                        |                     |                        |                               | 3                      | 0.0                         |                        |               |                        |
|              | 46 Transmission | 1                         | 6.5                    | 3                   | 18.7                   |                       |                        |                     |                        | 1                                      | 0.0                    | 3                   | 0.0                    |                                      |                        |                     |                        |                               |                        |                             |                        |               |                        |
|              | 47 Transmission |                           |                        |                     |                        |                       |                        |                     |                        |                                        | 1                      | 0.0                 |                        |                                      |                        |                     |                        |                               | 2                      | 0.0                         |                        |               |                        |
| Study Total  |                 | 40                        | 164.0                  | 41                  | 247.2                  | 8                     | 210.8                  | 0                   | 0                      | 34                                     | 176.3                  | 36                  | 71.1                   | 11                                   | 58.9                   | 12                  | 0.05                   | 47                            | 13.5                   | 35                          | 138.4                  | 16            | 41.4                   |
| Study Factor |                 |                           | 4.1                    |                     | 6.0                    |                       | 26.4                   |                     |                        |                                        | 5.2                    |                     | 2.0                    |                                      | 5.4                    |                     | 0.00                   |                               | 0.3                    |                             | 3.7                    |               | 2.6                    |

2



1 **Table S10 (continued):** Onsite Emissions Data at Each Compressor Facility used to calculate SOE (excluding exhaust methane emissions)

|              |              | Pneumatic |                        | Compressor Components |                        |        |                        |                  |                        |                        |                        |        |                        | Non-compressor components |                        |        |                        |                  |                        |                        |                        |        |                        |                    |                                  |
|--------------|--------------|-----------|------------------------|-----------------------|------------------------|--------|------------------------|------------------|------------------------|------------------------|------------------------|--------|------------------------|---------------------------|------------------------|--------|------------------------|------------------|------------------------|------------------------|------------------------|--------|------------------------|--------------------|----------------------------------|
|              |              |           |                        | Connector             |                        | Valves |                        | Open Ended Lines |                        | Pressure Relief Valves |                        | Meter  |                        | Connector                 |                        | Valves |                        | Open Ended Lines |                        | Pressure Relief Valves |                        | Meter  |                        | Inaccessible Leaks |                                  |
| Site #       | Sector       | Number    | Total Emissions (SCFM) | Number                | Total Emissions (SCFM) | Number | Total Emissions (SCFM) | Number           | Total Emissions (SCFM) | Number                 | Total Emissions (SCFM) | Number | Total Emissions (SCFM) | Number                    | Total Emissions (SCFM) | Number | Total Emissions (SCFM) | Number           | Total Emissions (SCFM) | Number                 | Total Emissions (SCFM) | Number | Total Emissions (SCFM) | Number             | Estimated Total Emissions (SCFM) |
| 1            | Storage      |           |                        | 9                     | 1.9                    | 7      | 0.3                    | 3                | Study Factor           | 1                      | Study Factor           |        |                        |                           |                        |        |                        |                  |                        |                        |                        |        |                        | 12                 | 36.1                             |
| 2            | Transmission | 5         | 1.7                    |                       |                        | 11     | 3.4                    |                  |                        |                        |                        |        |                        | 4                         | 0.5                    | 9      | 2.3                    | 1                | 0.0                    | 1                      | 0.0                    |        |                        |                    |                                  |
| 3            | Transmission |           |                        |                       |                        |        |                        |                  |                        |                        |                        |        |                        | 27                        | 2.9                    | 4      | 0.8                    | 1                | 0.4                    |                        |                        |        |                        |                    |                                  |
| 4            | Transmission | 4         | 0.7                    |                       |                        |        |                        |                  |                        |                        |                        |        |                        | 6                         | 4.7                    | 9      | 1.0                    | 3                | 1.0                    |                        |                        |        |                        | 3                  | 0.8                              |
| 5            | Transmission |           |                        |                       |                        |        |                        |                  |                        |                        |                        |        |                        | 1                         | 0.0                    | 5      | 0.7                    |                  |                        |                        |                        |        |                        |                    |                                  |
| 6            | Transmission |           |                        |                       |                        |        |                        |                  |                        |                        |                        |        |                        |                           |                        |        |                        |                  |                        |                        |                        |        |                        |                    |                                  |
| 7            | Transmission |           |                        |                       |                        |        |                        |                  |                        |                        |                        |        |                        |                           |                        |        |                        |                  |                        |                        |                        |        |                        |                    |                                  |
| 8            | Transmission |           |                        | 1                     | 0.0                    |        |                        |                  |                        |                        |                        |        |                        | 13                        | 5.3                    | 2      | 0.4                    | 3                | 3.6                    |                        |                        |        |                        |                    |                                  |
| 9            | Transmission |           |                        |                       |                        |        |                        |                  |                        |                        |                        |        |                        | 3                         | 0.1                    | 2      | 0.6                    |                  |                        |                        |                        |        |                        |                    |                                  |
| 10           | Transmission | 2         | 1.6                    | 4                     | 30.9                   | 2      | 0.5                    | 1                | 6.8                    |                        |                        |        |                        | 3                         | 0.2                    | 2      | 0.3                    | 2                | 3.1                    |                        |                        |        |                        |                    |                                  |
| 11           | Transmission |           |                        |                       |                        |        |                        |                  |                        |                        |                        |        |                        |                           |                        |        |                        |                  |                        |                        |                        |        |                        |                    |                                  |
| 12           | Transmission |           |                        | 14                    | 4.8                    |        |                        | 3                | 27.8                   |                        |                        |        |                        | 11                        | 0.4                    |        |                        | 2                | 0.5                    |                        |                        |        |                        |                    |                                  |
| 13           | Transmission |           |                        |                       |                        |        |                        |                  |                        |                        |                        |        |                        | 5                         | 1.1                    |        |                        | 1                | 0.0                    |                        |                        |        |                        |                    |                                  |
| 14           | Storage      |           |                        | 8                     | 2.2                    | 1      | 0.0                    | 10               | 1.0                    |                        |                        |        |                        |                           |                        |        |                        | 1                | Study Factor           |                        |                        |        |                        | 1                  | 0.5                              |
| 15           | Storage      |           |                        | 14                    | 2.0                    |        |                        | 10               | 4.4                    |                        |                        |        |                        |                           |                        |        |                        |                  |                        |                        |                        |        |                        |                    |                                  |
| 16.1         | Storage      |           |                        | 13                    | 1.0                    | 1      | 0.0                    | 6                | 10.2                   |                        |                        |        |                        |                           |                        |        |                        |                  |                        |                        |                        |        |                        |                    |                                  |
| 16.2         | Storage      |           |                        | 13                    | 1.0                    | 1      | 0.0                    | 6                | 10.2                   |                        |                        |        |                        |                           |                        |        |                        |                  |                        |                        |                        |        |                        |                    |                                  |
| 17           | Transmission |           |                        |                       |                        |        |                        |                  |                        |                        |                        |        |                        | 2                         | 0.3                    | 6      | 2.2                    | 1                | Study Factor           |                        |                        |        |                        | 5                  | 1.2                              |
| 18           | Transmission | 8         | 2.2                    | 9                     | 0.4                    | 12     | 0.1                    |                  |                        |                        |                        |        |                        | 14                        | 1.0                    | 11     | 1.4                    | 2                | 3.0                    | 1                      | 0.0                    |        |                        |                    |                                  |
| 20           | Storage      |           |                        | 13                    | 1.3                    | 6      | 10.5                   | 3                | 2.0                    |                        |                        |        |                        |                           |                        |        |                        |                  |                        |                        |                        |        |                        | 8                  | 19.5                             |
| 21           | Transmission | 13        | 2.3                    | 28                    | 1.1                    | 11     | 1.1                    |                  |                        |                        |                        |        |                        | 5                         | 0.5                    | 9      | 2.4                    |                  |                        |                        |                        |        |                        |                    |                                  |
| 22           | Transmission |           |                        | 2                     | 0.0                    |        |                        |                  |                        |                        |                        |        |                        | 12                        | 2.1                    | 3      | 0.3                    | 5                | 0.5                    |                        |                        |        |                        |                    |                                  |
| 23           | Storage      | 23        | 6.0                    | 7                     | 1.2                    | 3      | 0.3                    | 4                | 2.2                    |                        |                        |        |                        |                           |                        |        |                        |                  |                        |                        |                        |        |                        |                    |                                  |
| 24           | Transmission |           |                        |                       |                        | 1      | 0.0                    | 2                | 5.7                    |                        |                        |        |                        | 6                         | 0.3                    | 1      | 0.0                    |                  |                        |                        |                        |        |                        | 2                  | 0.4                              |
| 25           | Transmission |           |                        |                       |                        | 15     | 0.5                    | 1                | 0.1                    |                        |                        |        |                        | 6                         | 0.1                    | 4      | 0.1                    | 1                | 0.0                    | 1                      | 0.1                    |        |                        | 1                  | 0.5                              |
| 26           | Transmission |           |                        |                       |                        |        |                        |                  |                        |                        |                        |        |                        |                           |                        | 2      | 0.2                    | 2                | Study Factor           |                        |                        |        |                        | 2                  | 0.9                              |
| 27           | Transmission | 5         | 1.1                    | 2                     | 0.4                    | 5      | 0.1                    |                  |                        |                        |                        |        |                        | 17                        | 1.8                    | 13     | 6.8                    | 1                | 0.3                    | 1                      | 0.0                    |        |                        |                    |                                  |
| 28           | Transmission |           |                        |                       |                        | 2      | 0.0                    |                  |                        |                        |                        |        |                        | 5                         | 0.3                    | 4      | 0.2                    | 1                | 0.0                    |                        |                        |        |                        |                    |                                  |
| 29           | Transmission |           |                        | 26                    | 0.5                    | 28     | 10.5                   |                  |                        | 2                      | 0.2                    |        |                        | 9                         | 0.3                    | 16     | 2.1                    | 1                | 0.1                    | 3                      | 2.2                    |        |                        |                    |                                  |
| 30           | Transmission |           |                        | 4                     | 0.5                    | 5      | 1.8                    |                  |                        |                        |                        |        |                        | 4                         | 0.6                    | 2      | 0.3                    |                  |                        |                        |                        |        |                        |                    |                                  |
| 31           | Transmission |           |                        | 2                     | 0.4                    |        |                        |                  |                        |                        |                        |        |                        | 8                         | 1.5                    | 2      | 0.1                    |                  |                        |                        |                        |        |                        | 1                  | 0.2                              |
| 32           | Storage      | 36        | 16.1                   | 30                    | 2.9                    | 30     | 3.8                    | 13               | 2.2                    | 3                      | 0.2                    | 2      | 0.3                    |                           |                        |        |                        |                  |                        |                        |                        |        |                        | 10                 | 12.3                             |
| 33           | Transmission | 7         | 1.2                    | 4                     | 1.3                    | 1      | 0.0                    |                  |                        |                        |                        |        |                        | 1                         | 0.0                    | 3      | 0.1                    |                  |                        |                        |                        | 1      | 0.03                   |                    |                                  |
| 34           | Transmission |           |                        |                       |                        |        |                        |                  |                        |                        |                        |        |                        |                           |                        | 3      | 0.6                    | 2                | 0.4                    |                        |                        |        |                        | 1                  | 0.0                              |
| 35           | Transmission |           |                        |                       |                        |        |                        |                  |                        |                        |                        |        |                        | 2                         | 3.2                    |        |                        |                  |                        |                        |                        |        |                        |                    |                                  |
| 36           | Transmission | 2         | 0.2                    |                       |                        |        |                        |                  |                        |                        |                        |        |                        | 2                         | 0.1                    | 2      | 0.3                    | 1                | 0.0                    |                        |                        |        |                        |                    |                                  |
| 37           | Transmission |           |                        |                       |                        |        |                        |                  |                        |                        |                        |        |                        | 1                         | 0.3                    | 2      | 0.9                    |                  |                        |                        |                        |        |                        | 2                  | 7.5                              |
| 39           | Transmission |           |                        |                       |                        |        |                        |                  |                        |                        |                        |        |                        |                           |                        |        |                        |                  |                        |                        |                        |        |                        |                    |                                  |
| 40           | Transmission |           |                        |                       |                        |        |                        |                  |                        |                        |                        |        |                        | 1                         | 0.2                    |        |                        |                  |                        |                        |                        |        |                        | 2                  | 7.5                              |
| 41           | Transmission | 25        | 4.4                    |                       |                        | 1      | 0.0                    |                  |                        |                        |                        |        |                        | 13                        | 0.6                    | 13     | 0.8                    | 1                | 0.0                    | 1                      | 0.3                    |        |                        |                    |                                  |
| 42           | Transmission | 2         | 0.2                    |                       |                        |        |                        |                  |                        |                        |                        |        |                        | 2                         | 0.1                    | 1      | 0.0                    |                  |                        |                        |                        |        |                        |                    |                                  |
| 43.1         | Storage      | 2         | 0.1                    | 19                    | 4.7                    | 32     | 6.1                    | 12               | 10.8                   |                        |                        |        |                        |                           |                        |        |                        |                  |                        |                        |                        |        |                        | 5                  | 6.4                              |
| 43.2         | Storage      | 2         | 0.1                    | 19                    | 4.7                    | 32     | 6.1                    | 12               | 10.8                   |                        |                        |        |                        |                           |                        |        |                        |                  |                        |                        |                        |        |                        | 4                  | 4.4                              |
| 44           | Transmission |           |                        | 37                    | 7.3                    |        |                        | 7                | 2.3                    |                        |                        |        |                        | 13                        | 0.9                    |        |                        | 7                | 3.5                    |                        |                        |        |                        |                    |                                  |
| 45           | Transmission |           |                        | 5                     | 0.4                    | 11     | 4.0                    | 5                | 66.0                   |                        |                        |        |                        | 10                        | 3.7                    | 3      | 0.7                    | 3                | 1.2                    |                        |                        |        |                        | 6                  | 3.5                              |
| 46           | Transmission | 6         | 1.4                    | 7                     | 0.7                    | 34     | 4.8                    | 2                | 2.9                    |                        |                        |        |                        | 13                        | 0.9                    | 2      | 0.1                    |                  |                        |                        |                        |        |                        |                    |                                  |
| 47           | Transmission |           |                        |                       |                        |        |                        |                  |                        |                        |                        |        |                        |                           |                        |        |                        |                  |                        |                        |                        |        |                        |                    |                                  |
| Study Total  |              | 142       | 39.2                   | 290                   | 71.8                   | 252    | 54.0                   | 97               | 165.4                  | 5                      | 0.4                    | 2      | 0.3                    | 219                       | 34.2                   | 135    | 25.7                   | 38               | 17.9                   | 8                      | 2.7                    | 1      | 0.03                   | 65                 | 101.8                            |
| Study Factor |              |           | 0.3                    |                       | 0.2                    |        | 0.2                    |                  | 1.7                    |                        | 0.1                    |        | 0.1                    |                           | 0.2                    |        | 0.2                    |                  | 0.5                    |                        | 0.3                    |        | 0.03                   |                    |                                  |

2

3

1 **Table S11:** Data used to calculate EPA Greenhouse Gas Reporting Program (GHGRP) equivalent onsite emissions

|             |              | Reciprocating Rod Packing |                        | Centrifugal/ Wet Seal |                        | Reciprocating Unit Blowdown Valve/Vent |                        |                        | Centrifugal Unit Blowdown Valve/Vent |                        | Reciprocating Isolation Valve |                        | Centrifugal Isolation Valve |                        | Storage Tanks |                        |
|-------------|--------------|---------------------------|------------------------|-----------------------|------------------------|----------------------------------------|------------------------|------------------------|--------------------------------------|------------------------|-------------------------------|------------------------|-----------------------------|------------------------|---------------|------------------------|
|             |              | Operating                 |                        | Operating             |                        | Operating                              |                        | Standby Pressurized    | Operating                            |                        | Standby Depressurized         |                        | Standby Depressurized       |                        |               |                        |
| Site #      | Sector       | Number                    | Total Emissions (SCFM) | Number                | Total Emissions (SCFM) | Number                                 | Total Emissions (SCFM) | Total Emissions (SCFM) | Number                               | Total Emissions (SCFM) | Number                        | Total Emissions (SCFM) | Number                      | Total Emissions (SCFM) | Number        | Total Emissions (SCFM) |
| 1           | Storage      |                           |                        |                       |                        |                                        |                        | 5 33.6                 |                                      |                        |                               |                        | 1 13.8                      |                        |               |                        |
| 2           | Transmission |                           |                        |                       |                        |                                        |                        |                        |                                      |                        | 8 2.8                         |                        |                             |                        |               |                        |
| 3           | Transmission |                           |                        |                       |                        |                                        |                        |                        |                                      |                        |                               | 2 0.0                  |                             | 2 11.9                 |               |                        |
| 4           | Transmission |                           |                        |                       |                        |                                        |                        |                        |                                      |                        |                               | 9 12.9                 |                             |                        |               |                        |
| 5           | Transmission |                           |                        |                       |                        |                                        |                        |                        |                                      |                        |                               |                        |                             |                        | 1 0.0         |                        |
| 6           | Transmission |                           |                        |                       |                        |                                        |                        |                        |                                      |                        |                               |                        |                             |                        |               |                        |
| 7           | Transmission |                           |                        |                       |                        |                                        |                        |                        | 1 2.6                                |                        |                               |                        |                             |                        |               |                        |
| 8           | Transmission |                           |                        | 1 0.9                 |                        |                                        |                        |                        | 1 7.7                                |                        |                               |                        | 1 7.7                       |                        | 1 0.0         |                        |
| 9           | Transmission |                           |                        |                       |                        |                                        |                        |                        |                                      |                        |                               |                        |                             |                        |               |                        |
| 10          | Transmission | 3 8.3                     |                        |                       |                        | 1 51.3                                 |                        | 1 0.0                  |                                      |                        |                               |                        | 1 2.0                       |                        |               |                        |
| 11          | Transmission |                           |                        |                       |                        |                                        |                        |                        | 1 0.0                                |                        |                               |                        |                             |                        |               |                        |
| 12          | Transmission | 3 14.8                    |                        |                       |                        |                                        |                        |                        |                                      |                        |                               |                        |                             |                        |               |                        |
| 13          | Transmission |                           |                        |                       |                        |                                        |                        |                        |                                      |                        |                               |                        | 2 0.0                       |                        |               |                        |
| 14          | Storage      |                           |                        |                       |                        |                                        |                        |                        |                                      |                        | 6 0.0                         |                        |                             |                        |               |                        |
| 15          | Storage      | 4 10.9                    |                        |                       |                        | 4 23.3                                 |                        |                        |                                      |                        |                               |                        |                             |                        |               |                        |
| 16.1        | Storage      |                           |                        |                       |                        |                                        |                        |                        |                                      |                        |                               |                        |                             |                        |               |                        |
| 16.2        | Storage      | 1 1.4                     |                        |                       |                        |                                        |                        |                        |                                      |                        |                               |                        |                             |                        |               |                        |
| 17          | Transmission |                           |                        |                       |                        |                                        |                        |                        |                                      |                        |                               |                        |                             |                        |               |                        |
| 18          | Transmission |                           |                        |                       |                        |                                        |                        |                        |                                      |                        | 6 0.0                         |                        | 1 0.0                       |                        |               |                        |
| 20          | Storage      | 2 8.2                     |                        |                       |                        | 2 10.4                                 |                        |                        |                                      |                        |                               |                        |                             |                        |               |                        |
| 21          | Transmission | 8 0.7                     |                        |                       |                        | 8 0.0                                  |                        |                        |                                      |                        |                               |                        |                             |                        |               |                        |
| 22          | Transmission |                           |                        | 2 79.8                |                        |                                        |                        |                        | 2 0.0                                |                        |                               |                        |                             |                        | 1 0.7         |                        |
| 23          | Storage      | 3 6.3                     |                        |                       |                        | 3 16.4                                 |                        | 1 8.6                  |                                      |                        | 2 1.8                         |                        |                             |                        |               |                        |
| 24          | Transmission | 2 16.3                    |                        |                       |                        |                                        |                        |                        |                                      |                        |                               |                        |                             |                        | 1 0.2         |                        |
| 25          | Transmission |                           |                        |                       |                        |                                        |                        | 2 0.1                  |                                      |                        |                               |                        | 3 0.9                       |                        | 1 4.3         |                        |
| 26          | Transmission |                           |                        |                       |                        |                                        |                        |                        |                                      |                        |                               |                        |                             |                        |               |                        |
| 27          | Transmission |                           |                        |                       |                        |                                        |                        |                        |                                      |                        | 6 0.0                         |                        |                             |                        |               |                        |
| 28          | Transmission |                           |                        |                       |                        |                                        |                        | 2 3.3                  |                                      |                        |                               |                        |                             |                        |               |                        |
| 29          | Transmission |                           |                        |                       |                        |                                        |                        | 14 2.6                 |                                      |                        |                               |                        | 1 0.0                       |                        | 3 3.8         |                        |
| 30          | Transmission |                           |                        | 2 63.3                |                        |                                        |                        |                        | 1 0.0                                |                        |                               |                        | 4 2.2                       |                        |               |                        |
| 31          | Transmission |                           |                        | 3 66.8                |                        |                                        |                        |                        | 3 48.6                               |                        |                               |                        |                             |                        |               |                        |
| 32          | Storage      | 5 27.5                    |                        |                       |                        | 3 12.9                                 |                        | 2 28.4                 |                                      |                        | 3 3.1                         |                        |                             |                        |               |                        |
| 33          | Transmission | 2 57.0                    |                        |                       |                        | 2 1.9                                  |                        |                        |                                      |                        |                               |                        |                             |                        |               |                        |
| 34          | Transmission |                           |                        |                       |                        |                                        |                        |                        |                                      |                        |                               |                        |                             |                        |               |                        |
| 35          | Transmission |                           |                        |                       |                        |                                        |                        |                        |                                      |                        |                               |                        | 2 36.0                      |                        |               |                        |
| 36          | Transmission |                           |                        |                       |                        |                                        |                        |                        |                                      |                        |                               |                        | 2 14.2                      |                        |               |                        |
| 37          | Transmission |                           |                        |                       |                        |                                        |                        |                        |                                      |                        |                               |                        | 2 13.9                      |                        |               |                        |
| 39          | Transmission |                           |                        |                       |                        |                                        |                        |                        | 1 0.1                                |                        |                               |                        |                             |                        |               |                        |
| 40          | Transmission |                           |                        |                       |                        |                                        |                        |                        |                                      |                        |                               |                        | 2 50.7                      |                        |               |                        |
| 41          | Transmission |                           |                        |                       |                        |                                        |                        |                        |                                      |                        | 6 0.0                         |                        |                             |                        |               |                        |
| 42          | Transmission |                           |                        |                       |                        |                                        |                        |                        |                                      |                        |                               |                        | 1 0.0                       |                        | 1 7.5         |                        |
| 43.1        | Storage      |                           |                        |                       |                        |                                        |                        | 3 5.9                  |                                      |                        |                               |                        |                             |                        |               |                        |
| 43.2        | Storage      |                           |                        |                       |                        |                                        |                        | 2 3.9                  |                                      |                        |                               |                        |                             |                        |               |                        |
| 44          | Transmission | 2 14.2                    |                        |                       |                        | 3 75.7                                 |                        |                        |                                      |                        | 1 0.0                         |                        |                             |                        |               |                        |
| 45          | Transmission | 3 0.1                     |                        |                       |                        |                                        |                        |                        |                                      |                        | 1 0.3                         |                        |                             |                        |               |                        |
| 46          | Transmission | 1 6.5                     |                        |                       |                        |                                        |                        |                        |                                      |                        | 2 0.0                         |                        |                             |                        |               |                        |
| 47          | Transmission |                           |                        |                       |                        |                                        |                        | 1 0.0                  |                                      |                        | 2 0.0                         |                        |                             |                        |               |                        |
| Study Total |              | 39                        | 172.2                  | 8                     | 210.8                  | 26                                     | 191.9                  | 33 86.5                | 10                                   | 58.9                   | 43                            | 7.9                    | 34                          | 154.3                  | 11            | 28.4                   |

2

1 **Table S11 (continued):** Data used to calculate EPA Greenhouse Gas Reporting Program (GHGRP) equivalent onsite emissions

|             |                 | Pneumatic  |                        |           |                        |              |                        | Compressor Components |                        |        |                        |                 |                        |                       |                        |        |                        | Non-compressor components |                        |        |                        |                 |                        |                       |                        |        |                        |
|-------------|-----------------|------------|------------------------|-----------|------------------------|--------------|------------------------|-----------------------|------------------------|--------|------------------------|-----------------|------------------------|-----------------------|------------------------|--------|------------------------|---------------------------|------------------------|--------|------------------------|-----------------|------------------------|-----------------------|------------------------|--------|------------------------|
|             |                 | High Bleed |                        | Low Bleed |                        | Intermittent |                        | Connector             |                        | Valves |                        | Open Ended Line |                        | Pressure Relief Valve |                        | Meter  |                        | Connector                 |                        | Valves |                        | Open Ended Line |                        | Pressure Relief Valve |                        | Meter  |                        |
| Site #      | Sector          | Number     | Total Emissions (SCFM) | Number    | Total Emissions (SCFM) | Number       | Total Emissions (SCFM) | Number                | Total Emissions (SCFM) | Number | Total Emissions (SCFM) | Number          | Total Emissions (SCFM) | Number                | Total Emissions (SCFM) | Number | Total Emissions (SCFM) | Number                    | Total Emissions (SCFM) | Number | Total Emissions (SCFM) | Number          | Total Emissions (SCFM) | Number                | Total Emissions (SCFM) | Number | Total Emissions (SCFM) |
|             | 1 Storage       |            |                        |           |                        | 30           | 1.2                    | 11                    | 1.0                    | 8      | 2.0                    | 3               | 0.9                    | 1                     | 0.7                    |        |                        |                           |                        |        |                        |                 |                        |                       |                        |        |                        |
|             | 2 Transmission  | 5          | 1.5                    |           |                        | 34           | 1.3                    |                       |                        | 11     | 2.7                    |                 |                        |                       |                        |        |                        | 4                         | 0.4                    | 9      | 1.0                    | 1               | 0.2                    | 1                     | 0.03                   |        |                        |
|             | 3 Transmission  | 4          | 1.2                    | 1         | 0.02                   |              |                        |                       |                        |        |                        |                 |                        |                       |                        |        |                        | 27                        | 2.6                    | 4      | 0.4                    | 1               | 0.2                    |                       |                        |        |                        |
|             | 4 Transmission  |            |                        |           |                        |              |                        |                       |                        |        |                        |                 |                        |                       |                        |        |                        | 6                         | 0.6                    | 9      | 1.0                    | 4               | 0.8                    |                       |                        |        |                        |
|             | 5 Transmission  |            |                        |           |                        | 10           | 0.4                    |                       |                        |        |                        |                 |                        |                       |                        |        |                        | 1                         | 0.1                    | 5      | 0.5                    |                 |                        |                       |                        |        |                        |
|             | 6 Transmission  |            |                        |           |                        |              |                        |                       |                        |        |                        |                 |                        |                       |                        |        |                        |                           |                        |        |                        |                 |                        |                       |                        |        |                        |
|             | 7 Transmission  |            |                        |           |                        |              |                        |                       |                        |        |                        |                 |                        |                       |                        |        |                        |                           |                        |        |                        |                 |                        |                       |                        |        |                        |
|             | 8 Transmission  |            |                        |           |                        |              |                        | 1                     | 0.1                    |        |                        |                 |                        |                       |                        |        |                        | 13                        | 1.2                    |        |                        | 3               | 0.6                    |                       |                        |        |                        |
|             | 9 Transmission  |            |                        |           |                        |              |                        |                       |                        |        |                        |                 |                        |                       |                        |        |                        |                           |                        |        |                        |                 |                        |                       |                        |        |                        |
|             | 10 Transmission |            |                        |           |                        |              |                        | 4                     | 0.4                    | 2      | 0.5                    | 1               | 0.3                    |                       |                        |        |                        | 3                         | 0.3                    | 2      | 0.2                    |                 |                        |                       |                        |        |                        |
|             | 11 Transmission |            |                        |           |                        |              |                        |                       |                        |        |                        |                 |                        |                       |                        |        |                        | 3                         | 0.3                    | 2      | 0.2                    |                 |                        |                       |                        |        |                        |
|             | 12 Transmission | 1          | 0.3                    | 3         | 0.07                   | 5            | 0.2                    | 14                    | 1.3                    |        |                        | 3               | 0.9                    |                       |                        |        |                        | 11                        | 1.0                    |        |                        | 2               | 0.4                    |                       |                        |        |                        |
|             | 13 Transmission |            |                        |           |                        |              |                        |                       |                        |        |                        |                 |                        |                       |                        |        |                        | 5                         | 0.5                    |        |                        |                 |                        |                       |                        |        |                        |
|             | 14 Storage      |            |                        |           |                        |              |                        | 8                     | 0.7                    | 1      | 0.2                    | 10              | 2.9                    |                       |                        |        |                        |                           |                        |        |                        |                 |                        |                       |                        |        |                        |
|             | 15 Storage      | 7          | 2.1                    |           |                        |              |                        | 14                    | 1.3                    |        |                        | 10              | 2.9                    |                       |                        |        |                        |                           |                        |        |                        |                 |                        |                       |                        |        |                        |
|             | 16.1 Storage    |            |                        |           |                        |              |                        | 13                    | 1.2                    | 1      | 0.2                    | 6               | 1.7                    |                       |                        |        |                        |                           |                        |        |                        |                 |                        |                       |                        |        |                        |
|             | 16.2 Storage    |            |                        |           |                        |              |                        | 13                    | 1.2                    | 1      | 0.2                    | 6               | 1.7                    |                       |                        |        |                        |                           |                        |        |                        |                 |                        |                       |                        |        |                        |
|             | 17 Transmission |            |                        |           |                        |              |                        |                       |                        |        |                        |                 |                        |                       |                        |        |                        |                           |                        |        |                        |                 |                        |                       |                        |        |                        |
|             | 18 Transmission | 6          | 1.8                    | 3         | 0.07                   | 35           | 1.4                    | 9                     | 0.8                    | 12     | 3.0                    |                 |                        |                       |                        |        |                        | 14                        | 1.3                    | 11     | 1.2                    | 2               | 0.4                    | 1                     | 0.03                   |        |                        |
|             | 20 Storage      |            |                        |           |                        | 4            | 0.2                    | 16                    | 1.5                    | 7      | 1.7                    | 3               | 0.9                    |                       |                        |        |                        |                           |                        |        |                        |                 |                        |                       |                        |        |                        |
|             | 21 Transmission | 15         | 4.5                    | 4         | 0.09                   | 63           | 2.5                    | 28                    | 2.6                    | 11     | 2.7                    |                 |                        |                       |                        |        |                        | 5                         | 0.5                    | 9      | 1.0                    |                 |                        |                       |                        |        |                        |
|             | 22 Transmission |            |                        |           |                        |              |                        | 2                     | 0.2                    |        |                        |                 |                        |                       |                        |        |                        | 12                        | 1.1                    | 3      | 0.3                    | 5               | 0.9                    |                       |                        |        |                        |
|             | 23 Storage      |            |                        |           |                        |              |                        | 7                     | 0.7                    | 3      | 0.7                    | 4               | 1.2                    |                       |                        |        |                        |                           |                        |        |                        |                 |                        |                       |                        |        |                        |
|             | 24 Transmission |            |                        |           |                        |              |                        |                       |                        | 3      | 0.7                    | 2               | 0.6                    |                       |                        |        |                        | 6                         | 0.6                    | 1      | 0.1                    |                 |                        |                       |                        |        |                        |
|             | 25 Transmission |            |                        |           |                        | 37           | 1.4                    |                       |                        | 15     | 3.7                    | 1               | 0.3                    |                       |                        |        |                        | 6                         | 0.6                    | 4      | 0.4                    | 2               | 0.4                    | 1                     | 0.03                   |        |                        |
|             | 26 Transmission |            |                        |           |                        |              |                        |                       |                        |        |                        |                 |                        |                       |                        |        |                        |                           |                        | 2      | 0.2                    | 2               | 0.4                    |                       |                        |        |                        |
|             | 27 Transmission | 3          | 0.9                    | 2         | 0.05                   | 34           | 1.3                    | 2                     | 0.2                    | 5      | 1.2                    |                 |                        |                       |                        |        |                        | 17                        | 1.6                    | 13     | 1.4                    | 1               | 0.2                    | 1                     | 0.03                   |        |                        |
|             | 28 Transmission |            |                        |           |                        |              |                        | 2                     | 0.5                    |        |                        |                 |                        |                       |                        |        |                        | 5                         | 0.5                    | 4      | 0.4                    | 1               | 0.2                    |                       |                        |        |                        |
|             | 29 Transmission | 3          | 0.9                    | 2         | 0.05                   | 95           | 3.7                    | 26                    | 2.4                    | 28     | 6.9                    |                 |                        | 2                     | 1.3                    |        |                        | 9                         | 0.9                    | 16     | 1.7                    | 1               | 0.2                    | 3                     | 0.1                    |        |                        |
|             | 30 Transmission |            |                        |           |                        |              |                        | 4                     | 0.4                    | 5      | 1.2                    |                 |                        |                       |                        |        |                        | 4                         | 0.4                    | 2      | 0.2                    |                 |                        |                       |                        |        |                        |
|             | 31 Transmission |            |                        |           |                        |              |                        | 2                     | 0.2                    | 1      | 0.2                    |                 |                        |                       |                        |        |                        | 8                         | 0.8                    | 2      | 0.2                    |                 |                        |                       |                        |        |                        |
|             | 32 Storage      | 18         | 5.5                    |           |                        | 42           | 1.6                    | 31                    | 2.9                    | 30     | 7.4                    | 13              | 3.7                    | 3                     | 2.0                    | 2      | 0.6                    |                           |                        |        |                        |                 |                        |                       |                        |        |                        |
|             | 33 Transmission | 7          | 2.1                    | 1         | 0.02                   | 29           | 1.1                    | 4                     | 0.4                    | 1      | 0.2                    |                 |                        |                       |                        |        |                        | 1                         | 0.1                    | 3      | 0.3                    |                 |                        |                       | 1                      | 0.05   |                        |
|             | 34 Transmission |            |                        |           |                        |              |                        |                       |                        |        |                        |                 |                        |                       |                        |        |                        |                           |                        | 3      | 0.3                    | 2               | 0.4                    |                       |                        |        |                        |
|             | 35 Transmission |            |                        |           |                        |              |                        |                       |                        |        |                        |                 |                        |                       |                        |        |                        | 2                         | 0.2                    |        |                        |                 |                        |                       |                        |        |                        |
|             | 36 Transmission |            |                        |           |                        |              |                        |                       |                        |        |                        |                 |                        |                       |                        |        |                        | 2                         | 0.2                    | 2      | 0.2                    | 1               | 0.2                    |                       |                        |        |                        |
|             | 37 Transmission |            |                        |           |                        |              |                        |                       |                        |        |                        |                 |                        |                       |                        |        |                        | 1                         | 0.1                    | 2      | 0.2                    |                 |                        |                       |                        |        |                        |
|             | 39 Transmission |            |                        |           |                        |              |                        |                       |                        |        |                        |                 |                        |                       |                        |        |                        |                           |                        |        |                        |                 |                        |                       |                        |        |                        |
|             | 40 Transmission |            |                        |           |                        |              |                        |                       |                        |        |                        |                 |                        |                       |                        |        |                        | 1                         | 0.1                    |        |                        |                 |                        |                       |                        |        |                        |
|             | 41 Transmission | 7          | 2.1                    | 12        | 0.27                   | 54           | 2.1                    |                       |                        | 1      | 0.2                    |                 |                        |                       |                        |        |                        | 13                        | 1.2                    | 13     | 1.4                    | 1               | 0.2                    | 1                     | 0.03                   |        |                        |
|             | 42 Transmission | 1          | 0.3                    | 2         | 0.05                   | 25           | 1.0                    |                       |                        |        |                        |                 |                        |                       |                        |        |                        | 2                         | 0.2                    | 1      | 0.1                    |                 |                        |                       |                        |        |                        |
|             | 43.1 Storage    | 31         | 9.4                    | 2         | 0.05                   |              |                        | 21                    | 2.0                    | 32     | 7.9                    | 12              | 3.5                    |                       |                        |        |                        |                           |                        |        |                        |                 |                        |                       |                        |        |                        |
|             | 43.2 Storage    | 31         | 9.4                    | 2         | 0.05                   |              |                        | 21                    | 2.0                    | 32     | 7.9                    | 12              | 3.5                    |                       |                        |        |                        |                           |                        |        |                        |                 |                        |                       |                        |        |                        |
|             | 44 Transmission |            |                        |           |                        |              |                        | 37                    | 3.4                    |        |                        | 7               | 2.0                    |                       |                        |        |                        | 13                        | 1.2                    |        |                        | 7               | 1.3                    |                       |                        |        |                        |
|             | 45 Transmission |            |                        |           |                        |              |                        | 5                     | 0.5                    | 12     | 3.0                    | 6               | 1.7                    |                       |                        |        |                        | 10                        | 1.0                    | 4      | 0.4                    | 6               | 1.1                    |                       |                        |        |                        |
|             | 46 Transmission | 6          | 1.8                    | 4         | 0.09                   | 50           | 2.0                    | 7                     | 0.7                    | 34     | 8.4                    | 2               | 0.6                    |                       |                        |        |                        | 13                        | 1.2                    | 2      | 0.2                    |                 |                        |                       |                        |        |                        |
|             | 47 Transmission |            |                        |           |                        | 7            | 0.3                    |                       |                        |        |                        |                 |                        |                       |                        |        |                        |                           |                        |        |                        |                 |                        |                       | 0.0                    |        |                        |
| Study Total |                 | 145        | 44.0                   | 38        | 0.87                   | 554          | 21.7                   | 300                   | 28.0                   | 258    | 63.8                   | 101             | 29.1                   | 6                     | 4.0                    | 2      | 0.6                    | 219                       | 20.8                   | 138    | 14.8                   | 43              | 8.1                    | 8                     | 0.3                    | 1      | 0.05                   |

2
